# Supplementary material for: Increased flow rate of hyperpolarized aqueous solution for dynamic nuclear polarization-enhanced magnetic resonance imaging achieved by an open Fabry–Pérot type microwave resonator
Source: Copernicus journal article supplement (doi:10.5194/mr-1-275-2020), 2020-11-18
Supplement: Supplementary file 1 [file mr-1-275-2020-supplement.zip]

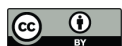

## *Supplement of*

# **Increased flow rate of hyperpolarized aqueous solution for dynamic nuclear polarization-enhanced magnetic resonance imaging achieved by an open Fabry–Pérot type microwave resonator**

**Alexey Fedotov et al.**

*Correspondence to:* Thomas F. Prisner (prisner@chemie.uni-frankfurt.de)  
and Vasyl Denysenkov (denysenkov@em.uni-frankfurt.de)

- mr-1-275-2020-supplement-title-page.pdf
- Fabry\_Perot resonator design.dwg
- Fabry\_Perot resonator simulation.cst

The copyright of individual parts of the supplement might differ from the CC BY 4.0 License.
